# Supplementary material
Source: MDPI journal article supplement (https://www.mdpi.com/2227-9040/11/4/239)
Supplement: s1 [file s1]

**Supplementary material for:**

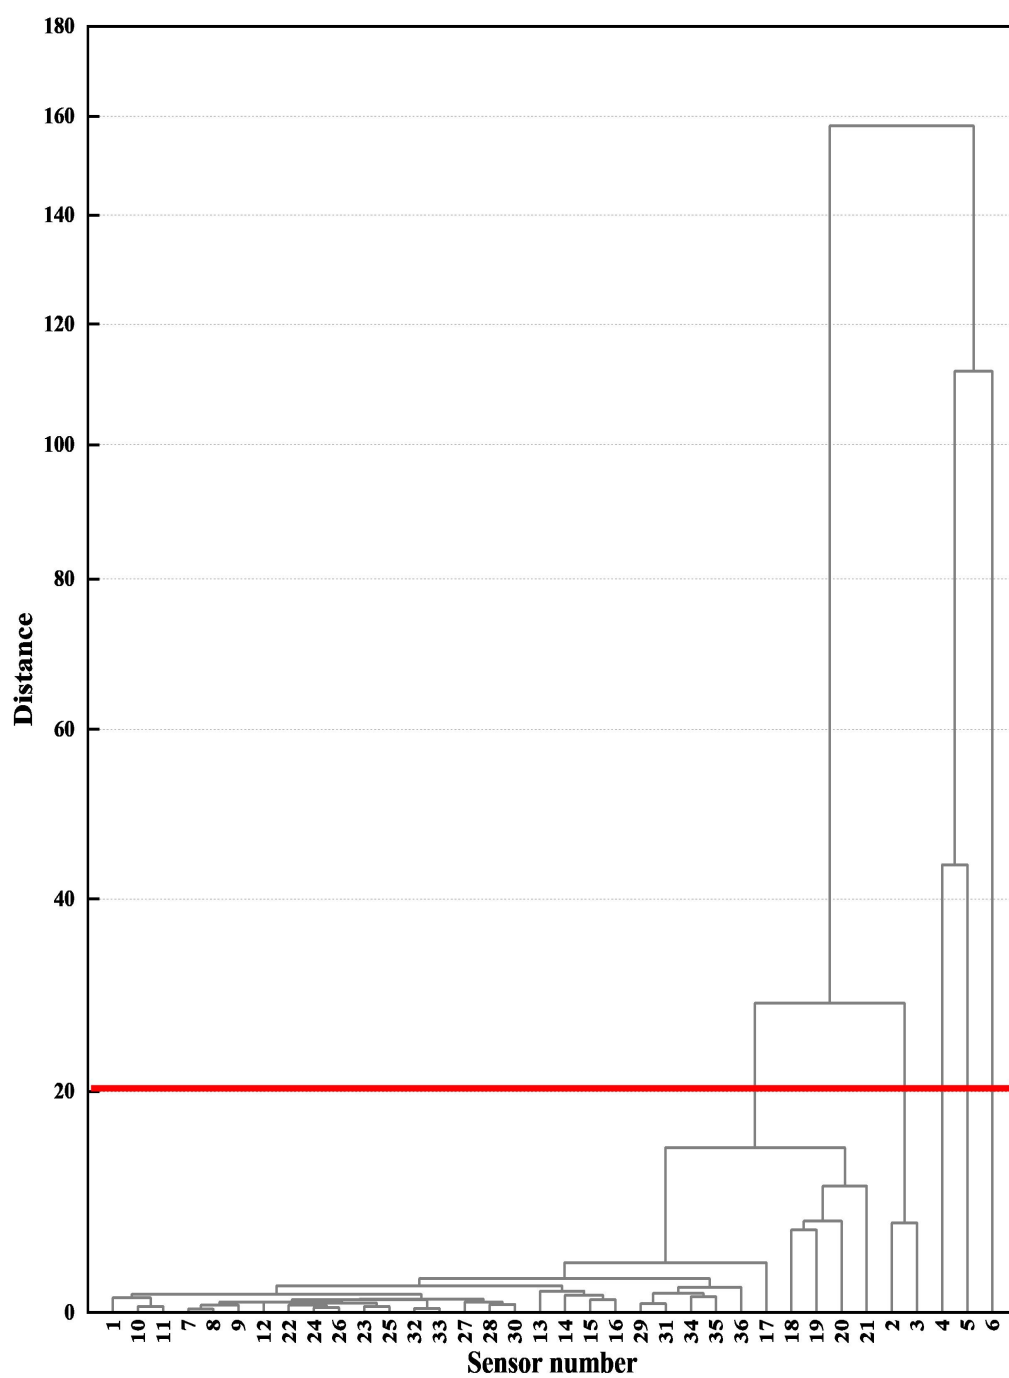

**Figure S1.** Cluster analysis of the different gas-sensitive materials.

**Table S1.** Sensor number of the gas-sensitive materials.

| Sensor number | Modification ratio<br>(mol%) | Sensor number | Modification ratio<br>(mol%) |
|---------------|------------------------------|---------------|------------------------------|
| Sensor 1      | WO <sub>3</sub>              | Sensor 19     | WO <sub>3</sub> -0.3mol% Pt  |
| Sensor 2      | WO <sub>3</sub> -0.1mol% Pd  | Sensor 20     | WO <sub>3</sub> -0.4mol% Pt  |
| Sensor 3      | WO <sub>3</sub> -0.2mol% Pd  | Sensor 21     | WO <sub>3</sub> -0.5mol% Pt  |
| Sensor 4      | WO <sub>3</sub> -0.3mol% Pd  | Sensor 22     | WO <sub>3</sub> -0.1mol% Rh  |
| Sensor 5      | WO <sub>3</sub> -0.4mol% Pd  | Sensor 23     | WO <sub>3</sub> -0.2mol% Rh  |
| Sensor 6      | WO <sub>3</sub> -0.5mol% Pd  | Sensor 24     | WO <sub>3</sub> -0.3mol% Rh  |
| Sensor 7      | WO <sub>3</sub> -0.1mol% Au  | Sensor 25     | WO <sub>3</sub> -0.4mol% Rh  |
| Sensor 8      | WO <sub>3</sub> -0.2mol% Au  | Sensor 26     | WO <sub>3</sub> -0.5mol% Rh  |
| Sensor 9      | WO <sub>3</sub> -0.3mol% Au  | Sensor 27     | WO <sub>3</sub> -0.1mol% Ru  |
| Sensor 10     | WO <sub>3</sub> -0.4mol% Au  | Sensor 28     | WO <sub>3</sub> -0.2mol% Ru  |
| Sensor 11     | WO <sub>3</sub> -0.5mol% Au  | Sensor 29     | WO <sub>3</sub> -0.3mol% Ru  |
| Sensor 12     | WO <sub>3</sub> -0.1mol% Ag  | Sensor 30     | WO <sub>3</sub> -0.4mol% Ru  |
| Sensor 13     | WO <sub>3</sub> -0.2mol% Ag  | Sensor 31     | WO <sub>3</sub> -0.5mol% Ru  |
| Sensor 14     | WO <sub>3</sub> -0.3mol% Ag  | Sensor 32     | WO <sub>3</sub> -0.1mol% Ir  |
| Sensor 15     | WO <sub>3</sub> -0.4mol% Ag  | Sensor 33     | WO <sub>3</sub> -0.2mol% Ir  |
| Sensor 16     | WO <sub>3</sub> -0.5mol% Ag  | Sensor 34     | WO <sub>3</sub> -0.3mol% Ir  |
| Sensor 17     | WO <sub>3</sub> -0.1mol% Pt  | Sensor 35     | WO <sub>3</sub> -0.4mol% Ir  |
| Sensor 18     | WO <sub>3</sub> -0.2mol% Pt  | Sensor 36     | WO <sub>3</sub> -0.5mol% Ir  |
